# Supplementary material for: GTSE1, CDC20, PCNA, and MCM6 Synergistically Affect Regulations in Cell Cycle and Indicate Poor Prognosis in Liver Cancer
Source: Hindawi journal article supplement (doi:10.1155/2019/1038069), 2019-12-30
Supplement: f1 [file 1038069.f1.pdf]

# GTSE1, CDC20, PCNA and MCM6 Synergistically Effect in Cell Cycle and Indicate Poor Prognosis in Liver Cancer

## *Supplementary Materials*

**YONGCHANG ZHENG<sup>1,\*</sup>, YUE SHI<sup>1,\*</sup>, SI YU<sup>1,\*</sup>, YUANYUAN HAN<sup>2</sup>, KAI KANG<sup>1</sup>, SHUNDA DU<sup>1</sup>, HUAJIAN GU<sup>3</sup>, XINTING SANG<sup>1</sup>, YANG CHEN<sup>4,#</sup> AND JINGYU WANG<sup>4,5</sup>**  
#

<sup>1</sup>Department of Liver Surgery, Peking Union Medical College Hospital, Chinese Academy of Medical Sciences & Peking Union Medical College, Beijing 100730, China;

<sup>2</sup>Center of Tree Shrew Germplasm Resources, Institute of Medical Biology, The Chinese Academy of Medical Sciences and Peking Union Medical College, Yunnan Key Laboratory of Vaccine Research and Development on Severe Infectious Diseases, Kunming, Yunnan 650118, P.R. China.

<sup>3</sup>Department of Hepatobiliary Surgery, Affiliated Hospital of Guizhou Medical University, No. 28, Guiyi Street, Yunyan District, 550004 Guiyang P. R. China.

<sup>4</sup>MOE Key Laboratory of Bioinformatics, Center for Synthetic and Systems Biology, Bioinformatics Division, BNRist, Department of Automation, Tsinghua University, Beijing 100084, China.

<sup>5</sup>Department of Basic Medical Science, Tsinghua-Peking Joint Center for Life Sciences, School of Medicine, Tsinghua University, Beijing 100084, China.

\*These authors contributed equally to this work.

### **#Correspondence:**

Correspondence and requests for materials should be addressed to Y.C. (email: yc@tsinghua.edu.cn) or to J.Y.W. (email: wangjingyu@tsinghua.edu.cn)

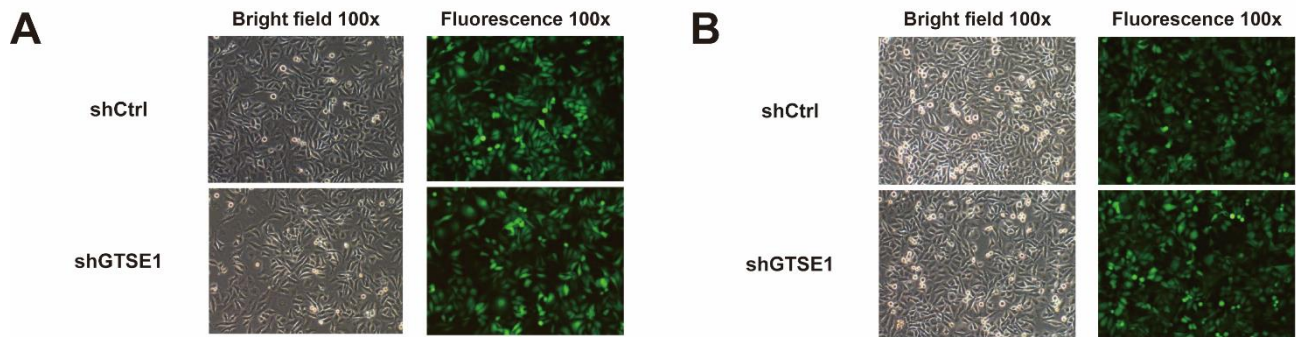

**Supplementary Figure 1.** Transfection images of BEL-7404 cells transfected by shRNA lentivirus against GTSE1. **(A)** Transfection image of psc34526. **(B)** Transfection image of psc34528. Over 80% cells in both shGTSE1 (psc34526) and shGTSE1 (psc34528) group were infected after 72 hours after transfection.

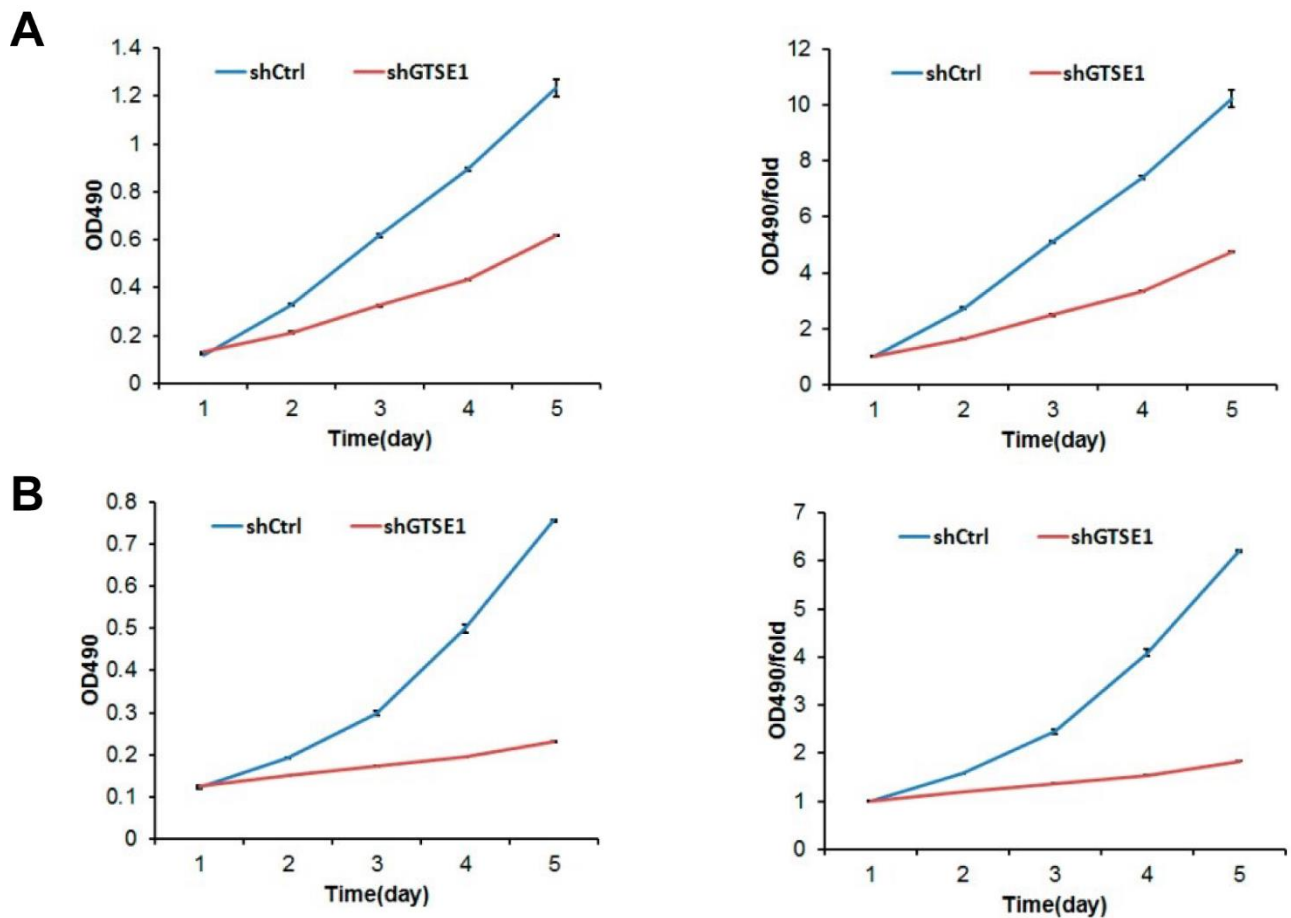

**Supplementary Figure 2.** Cell growth rates measured by methyl-thiazolyl-tetrazolium (MTT) assay. **(A)** Absorption and absorption fold changes of shCtrl and shGTSE1 (psc34526) at 490 nm. **(B)** Absorption and absorption fold changes of shCtrl and shGTSE1 (psc34528) at 490 nm. For **A** and **B**, OD 490 represents the number of living cells, data are presented as the mean  $\pm$ SD. GAPDH was used as the endogenous control.

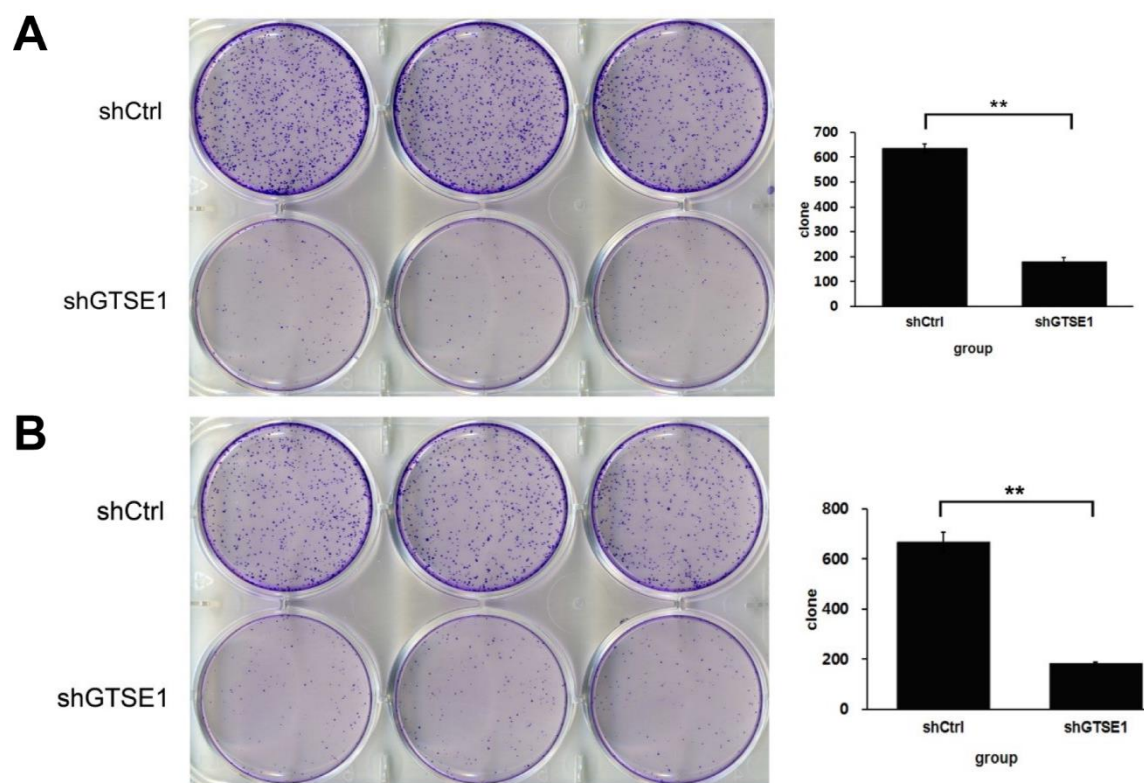

**Supplementary Figure 3.** Colony formation of BEL-7404 cells with GTSE1 knockdown. **(A)** Image and colony number evaluation of shGTSE1 (psc34526). **(B)** Image and colony number evaluation of shGTSE1 (psc34528). For **A** and **B**, data are presented as the mean  $\pm$ SD. \*\* $p < 0.01$  vs. shCtrl. GAPDH was used as the endogenous control.

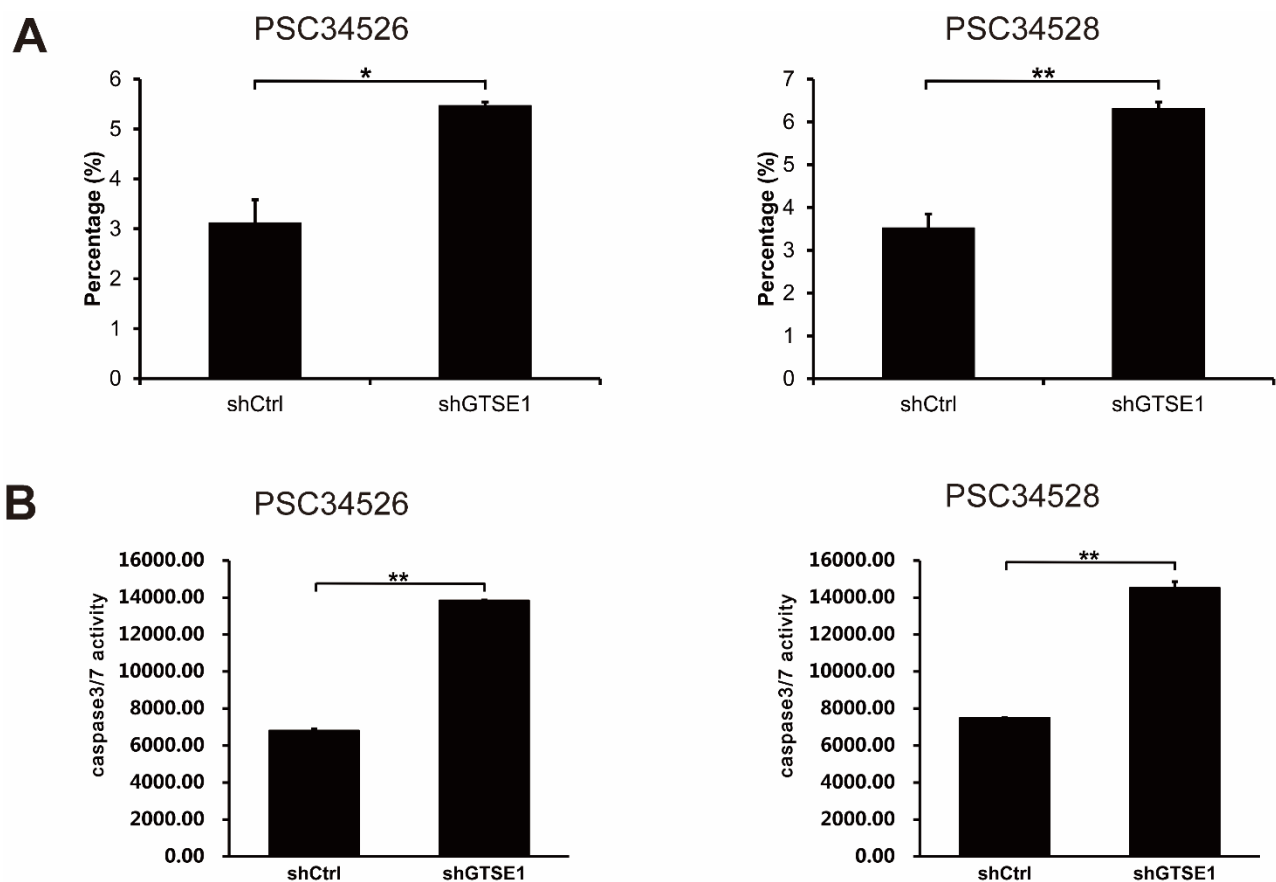

**Supplementary Figure 4.** Results of apoptosis assay and caspase3-7 assay. **(A)** Apoptosis percentage of shGTSE1 (psc34526), shGTSE1 (psc34526) and shCtrl 5 days after RNAi transfection. **(B)** Caspase3/7 activity between shGTSE1 (psc34526), shGTSE1 (psc34526) and shCtrl 5 days after RNAi transfection. For **A** and **B**, data are presented as the mean  $\pm$ SD. \* $p < 0.05$  and \*\* $p < 0.01$  vs. shCtrl. GAPDH was used as the endogenous control.

**Supplementary Table 1.** Sequences of shRNA against GTSE1

| Sequence number | 5' additional bases | STEM                      | Loop   | STEM                      | 3' additional bases |
|-----------------|---------------------|---------------------------|--------|---------------------------|---------------------|
| psc34526-1      | CCGG                | GCCTACTCCTA<br>CAAATCAATT | CTCGAG | AATTGATTTGT<br>AGGAGTAGGC | TTTTTG              |
| psc34526-2      | AATTCAAA<br>AA      | GCCTACTCCTA<br>CAAATCAATT | CTCGAG | AATTGATTTGT<br>AGGAGTAGGC |                     |
| psc34528-1      | CCGG                | CGGCGAGATT<br>CCTGTCTAAAT | CTCGAG | ATTTAGACAGG<br>AATCTCGCCG | TTTTTG              |
| psc34528-2      | AATTCAAA<br>AA      | CGGCGAGATT<br>CCTGTCTAAAT | CTCGAG | ATTTAGACAGG<br>AATCTCGCCG |                     |

**Supplementary Table 2.** Efficiency of shRNA knockdown against GTSE1

| Sample            | Average<br>( $2^{-\Delta\Delta Ct}$ ) | STDEV | P-value |
|-------------------|---------------------------------------|-------|---------|
| shCtrl            | 1.018                                 | 0.241 |         |
| shGTSE1(PSC34526) | 0.122                                 | 0.001 | 0.023   |
| shGTSE1(PSC34528) | 0.118                                 | 0.005 | 0.023   |

**Supplementary Table 3.** Cell counts of transwell assay (200×)

| 200X Cell counts          | shCtrl      |        |        | shGTSE1 |        |        |
|---------------------------|-------------|--------|--------|---------|--------|--------|
|                           | Hole 1      | Hole 2 | Hole 3 | Hole 1  | Hole 2 | Hole 3 |
| field 1                   | 198         | 217    | 207    | 102     | 112    | 108    |
| field 2                   | 186         | 210    | 194    | 98      | 108    | 107    |
| field 3                   | 211         | 197    | 208    | 115     | 119    | 112    |
| field 4                   | 217         | 219    | 202    | 99      | 111    | 99     |
| field 5                   | 227         | 199    | 215    | 90      | 109    | 118    |
| field 6                   | 201         | 187    | 210    | 97      | 108    | 102    |
| field 7                   | 209         | 196    | 226    | 107     | 98     | 120    |
| field 8                   | 229         | 227    | 219    | 108     | 118    | 119    |
| field 9                   | 216         | 192    | 206    | 106     | 101    | 91     |
| Migratory cells per field | 210         | 205    | 210    | 102     | 109    | 108    |
| Average                   | 208         |        |        | 107     |        |        |
| Stdev.                    | 3.01        |        |        | 3.75    |        |        |
| P VALUE                   | 3.32026E-06 |        |        |         |        |        |
| Migration Fold Change     | 1.01        | 0.98   | 1.01   | 0.49    | 0.52   | 0.52   |
| Average                   | 1.00        |        |        | 0.51    |        |        |
| Stdev.                    | 0.01        |        |        | 0.02    |        |        |
| P VALUE                   | 3.32026E-06 |        |        |         |        |        |

**Supplementary Table 4.** Cell counts of invasion assay (200×)

|  | shCtrl | shGTSE1 |
|--|--------|---------|
|--|--------|---------|

| 200X Cell counts                 | Hole 1      | Hole 2     | Hole 3     | Hole 1     | Hole 2      | Hole 3      |
|----------------------------------|-------------|------------|------------|------------|-------------|-------------|
| field 1                          | 164         | 164        | 147        | 117        | 101         | 101         |
| field 2                          | 172         | 177        | 151        | 124        | 98          | 87          |
| field 3                          | 182         | 172        | 158        | 117        | 98          | 97          |
| field 4                          | 166         | 181        | 150        | 120        | 87          | 103         |
| field 5                          | 168         | 188        | 155        | 112        | 107         | 111         |
| field 6                          | 152         | 172        | 147        | 101        | 104         | 102         |
| field 7                          | 170         | 171        | 141        | 121        | 97          | 121         |
| field 8                          | 155         | 173        | 160        | 107        | 103         | 107         |
| field 9                          | 161         | 169        | 139        | 107        | 105         | 96          |
| <b>Migratory cells per field</b> | <b>166</b>  | <b>174</b> | <b>150</b> | <b>114</b> | <b>100</b>  | <b>103</b>  |
| <b>Average</b>                   | 163         |            |            | 106        |             |             |
| <b>Stdev.</b>                    | 12.34       |            |            | 3.75       |             |             |
| <b>P VALUE</b>                   | 0.002284129 |            |            |            |             |             |
| <b>Migration Fold Change</b>     | 1.01        | 1.07       | 0.92       | 0.70       | <b>0.61</b> | <b>0.63</b> |
| <b>Average</b>                   | 1.00        |            |            | 0.65       |             |             |
| <b>Stdev.</b>                    | 0.08        |            |            | 0.05       |             |             |
| <b>P VALUE</b>                   | 0.002284129 |            |            |            |             |             |

Supplementary Table 5. Data of Cell Cycle analysis

| PSC34526       |              |             |                | PSC34528       |              |             |                |
|----------------|--------------|-------------|----------------|----------------|--------------|-------------|----------------|
| Group          | G1           | S           | G2/M           | Group          | G1           | S           | G2/M           |
| shCtrl         | 48.92        | 48.4        | 2.68           | shCtrl         | 51.8         | 31.86       | 16.34          |
|                | 50.6         | 47.41       | 2              |                | 52.39        | 30.69       | 16.92          |
|                | 49.79        | 47.31       | 2.9            |                | 52.1         | 31.4        | 16.5           |
| shGTSE1        | 60.67        | 34.15       | 5.17           | shGTSE1        | 52.83        | 26.98       | 20.19          |
|                | 60.27        | 33.64       | 6.09           |                | 53.13        | 25.58       | 21.29          |
|                | 62.12        | 31.96       | 5.92           |                | 53.1         | 26.42       | 20.48          |
| <b>Average</b> | <b>G1</b>    | <b>S</b>    | <b>G2/M</b>    | <b>Average</b> | <b>G1</b>    | <b>S</b>    | <b>G2/M</b>    |
| shCtrl         | 49.77        | 47.71       | 2.53           | shCtrl         | 52.1         | 31.32       | 16.59          |
| shGTSE1        | 61.02        | 33.25       | 5.73           | shGTSE1        | 53.02        | 26.33       | 20.65          |
| <b>STDEV</b>   | <b>ST.G1</b> | <b>ST.S</b> | <b>ST.G2/M</b> | <b>STDEV</b>   | <b>ST.G1</b> | <b>ST.S</b> | <b>ST.G2/M</b> |

|                          |                |          |             |                          |                |          |             |
|--------------------------|----------------|----------|-------------|--------------------------|----------------|----------|-------------|
| <b>shCtrl</b>            | 0.8402         | 0.6025   | 0.4692      | <b>shCtrl</b>            | 0.295          | 0.5894   | 0.2996      |
| <b>shGTSE1</b>           | 0.9734         | 1.1459   | 0.4895      | <b>shGTSE1</b>           | 0.1652         | 0.7047   | 0.5701      |
| <b>T-Test</b>            | <b>P Value</b> |          |             | <b>T-Test</b>            | <b>P Value</b> |          |             |
|                          | <b>G1</b>      | <b>S</b> | <b>G2/M</b> |                          | <b>G1</b>      | <b>S</b> | <b>G2/M</b> |
| <b>shCtrl vs shGTSE1</b> | 0.00011        | 0.00004  | 0.00122     | <b>shCtrl vs shGTSE1</b> | 0.00911        | 0.00071  | 0.0004      |
